# Supplementary material for: High-temperature plastic deformation of $$\langle 110\rangle$$-oriented BaTiO3 single crystals
Source: Springer Nature journal article supplement (doi:10.1557/s43578-022-00485-6), 2022-01-19
Supplement: MOESM1 [file 43578_2022_485_MOESM1_ESM.pdf]

Supplementary

## High-temperature plastic deformation of <110>-oriented BaTiO<sub>3</sub> single crystals

Marion Höfling<sup>1,2\*</sup>, Lukas Porz<sup>1</sup>, Michael Scherer<sup>1</sup>, Shuang Gao<sup>1,3</sup>, Fangping Zhuo<sup>1</sup>, Daniel Isaia<sup>1</sup>, Jürgen Rödel<sup>1</sup>

<sup>1</sup> Department of Materials and Earth Sciences, Technical University of Darmstadt, 64287 Darmstadt, Germany

<sup>2</sup> Department of Physics, Technical University of Denmark, 2800 Kgs. Lyngby, Denmark

<sup>3</sup> Key Laboratory of Advanced Technologies of Materials (Ministry of Education), School of Materials Science and Engineering, Southwest Jiaotong University, Chengdu 610031, PR China

\* Corresponding author: [hoefling@ceramics.tu-darmstadt.de](mailto:hoefling@ceramics.tu-darmstadt.de)

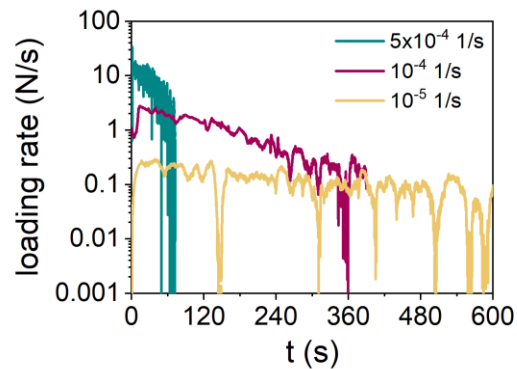

**Fig. S1** Loading rate as function of time for the strain-rate control experiments in Figure 3a. The resulting loading rate of 20 N/s for the initial strain rate of  $5 \times 10^{-4}$  1/s implies a high risk of sample failure in the first few seconds.

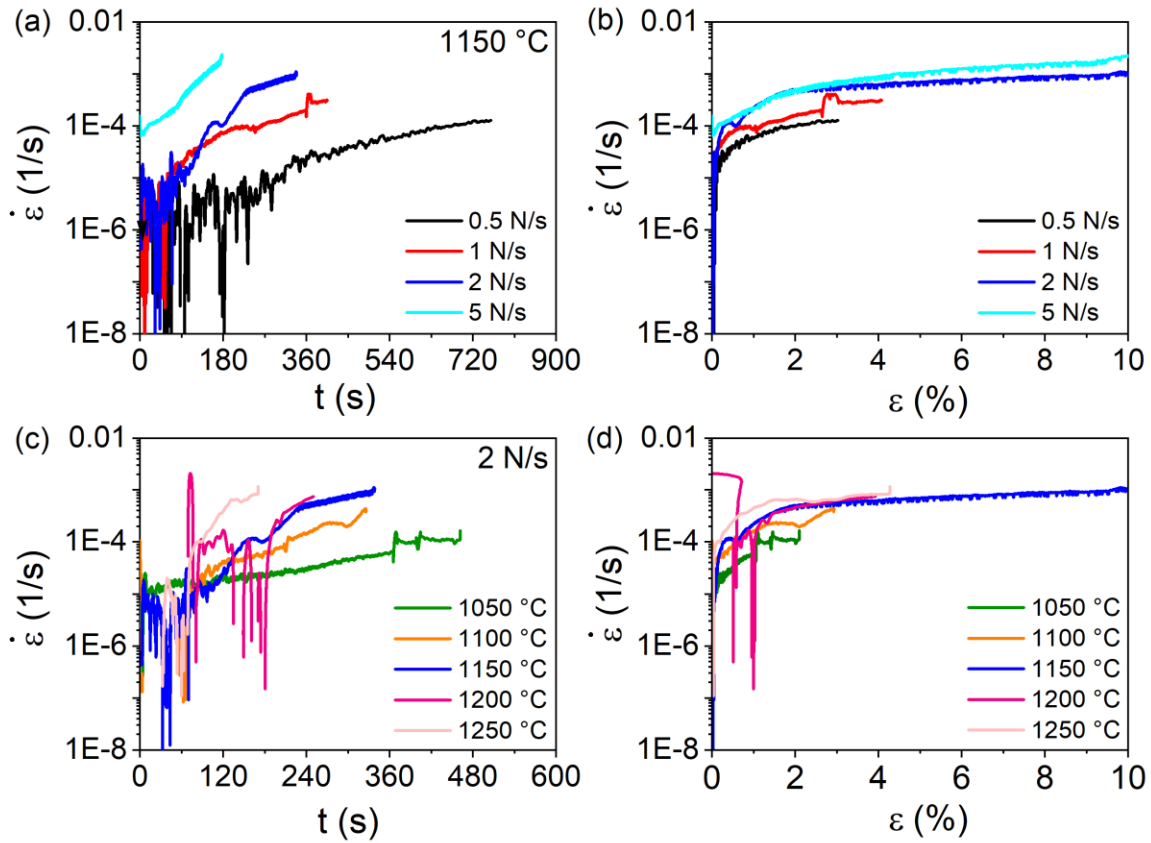

**Fig. S2** Strain rate as a function of time and of strain for load control compression experiments at (a, b) different loading rates and (c,d) at different temperatures.

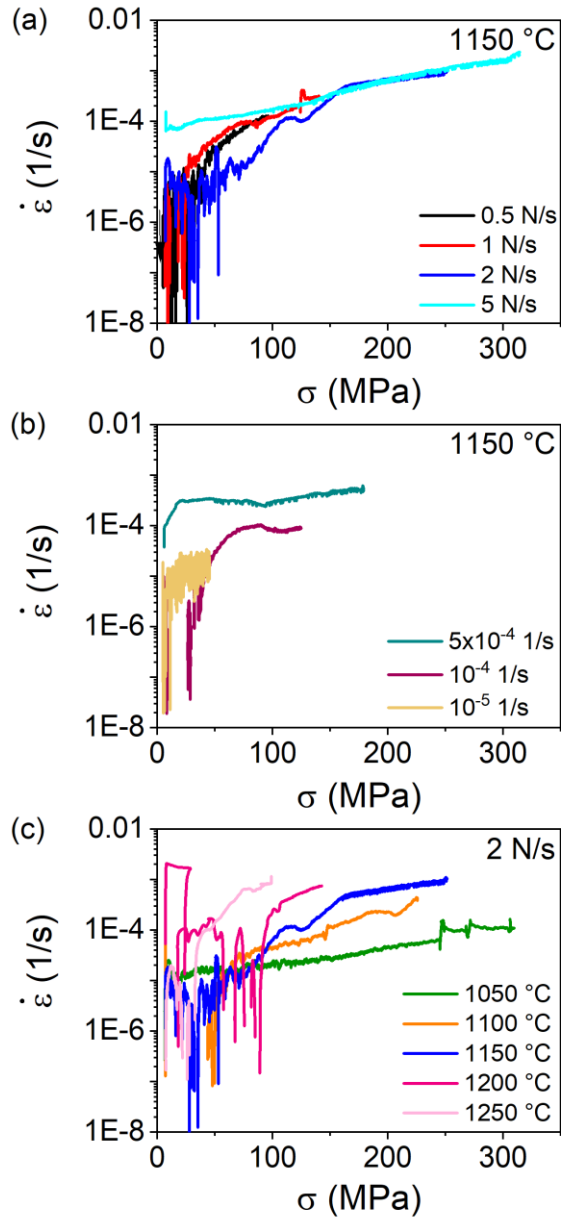

**Fig. S3** Strain rate as a function of stress for (a) loading rate control, (b) strain rate control and (c) temperature dependent load control experiments.
